# Supplementary material for: Ube3a deficiency inhibits amyloid plaque formation in APPswe/PS1δE9 mouse model of Alzheimer’s disease
Source: Oxford University Press journal article supplement (doi:10.1093/hmg/ddx295), 2017-07-24

## Supplementary information

**Figure S1.** Generation of Ube3a-maternal deficient AD mice. Ube3a-maternal deficient AD mice (AD/Ube3a (m-/p+)) were generated by crossing Ube3a-maternal deficient females Ube3a(m-/p+) with AD transgenic males (APPswe/PSEN1 $\delta$ E9). Genotypes were confirmed by PCR using primer specific for human APPswe/PSEN1 $\delta$ E9 and mouse *Ube3a* gene (A). B) Immunoblot analysis of Ube3a and transgenic human APP/PS1. Cortical samples from 4 months old mice of various genotypes were used for immunoblot analysis. Note the absence of Ube3a expression in maternally Ube3a-null wild-type WT/Ube3a(m-/p+) or AD mice (AD/Ube3a(m-/p+)) and presence of APPswe/PSEN1 $\delta$ E9 transgenes in AD and AD/Ube3a(m-/p+) mice.

**Figure S2.** A) Ube3a-deficient AD mice exhibits significant decrease in brain weight at their 12 months of age. Values are mean  $\pm$  SD of 5 animals in each genotypes. \* $p < 0.05$  when compared to wild type, Ube3a-maternal deficient and AD mice groups (one-way ANOVA). B) Representative immunohistochemical staining of GFAP. C) TUNEL staining. DNaseI treated section was used as positive control. Brain sections obtained from 3 different mice in each genotypes at their age of 12 months were used for both staining. Cortical region was shown in both the staining.

**Figure S3.** Representative immunohistochemical staining of A $\beta$  plaques in the brain section obtained from AD and Ube3a-maternal deficient AD mice of different age. Brain sections were stained with 6E10 antibody. Scale bar; 500 $\mu$ m.

Figure S1

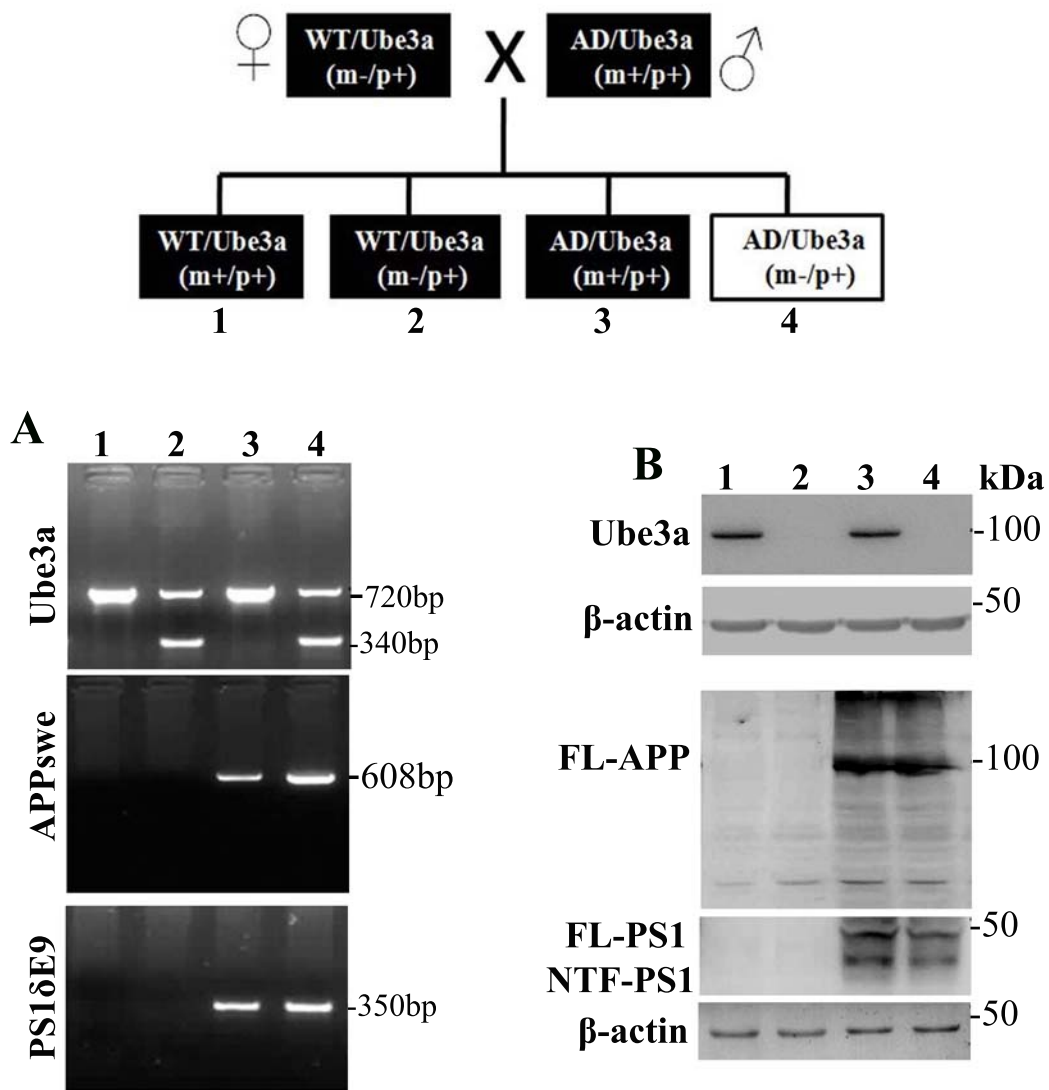

Figure S2

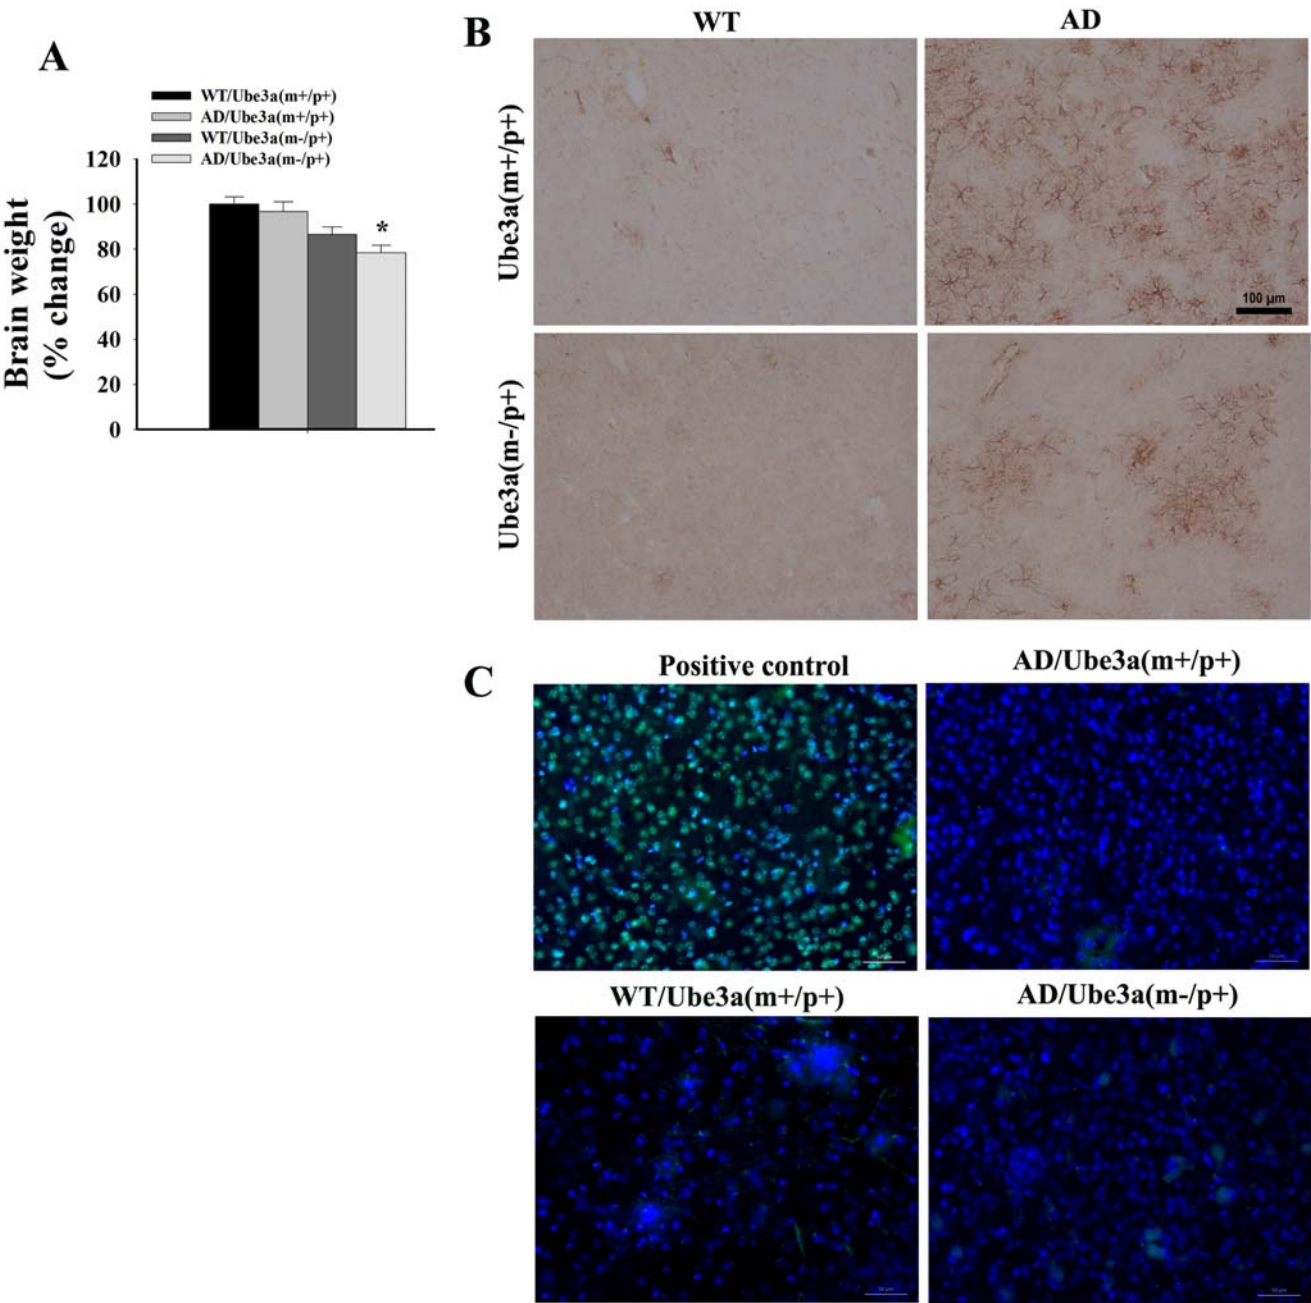

**Figure S3**

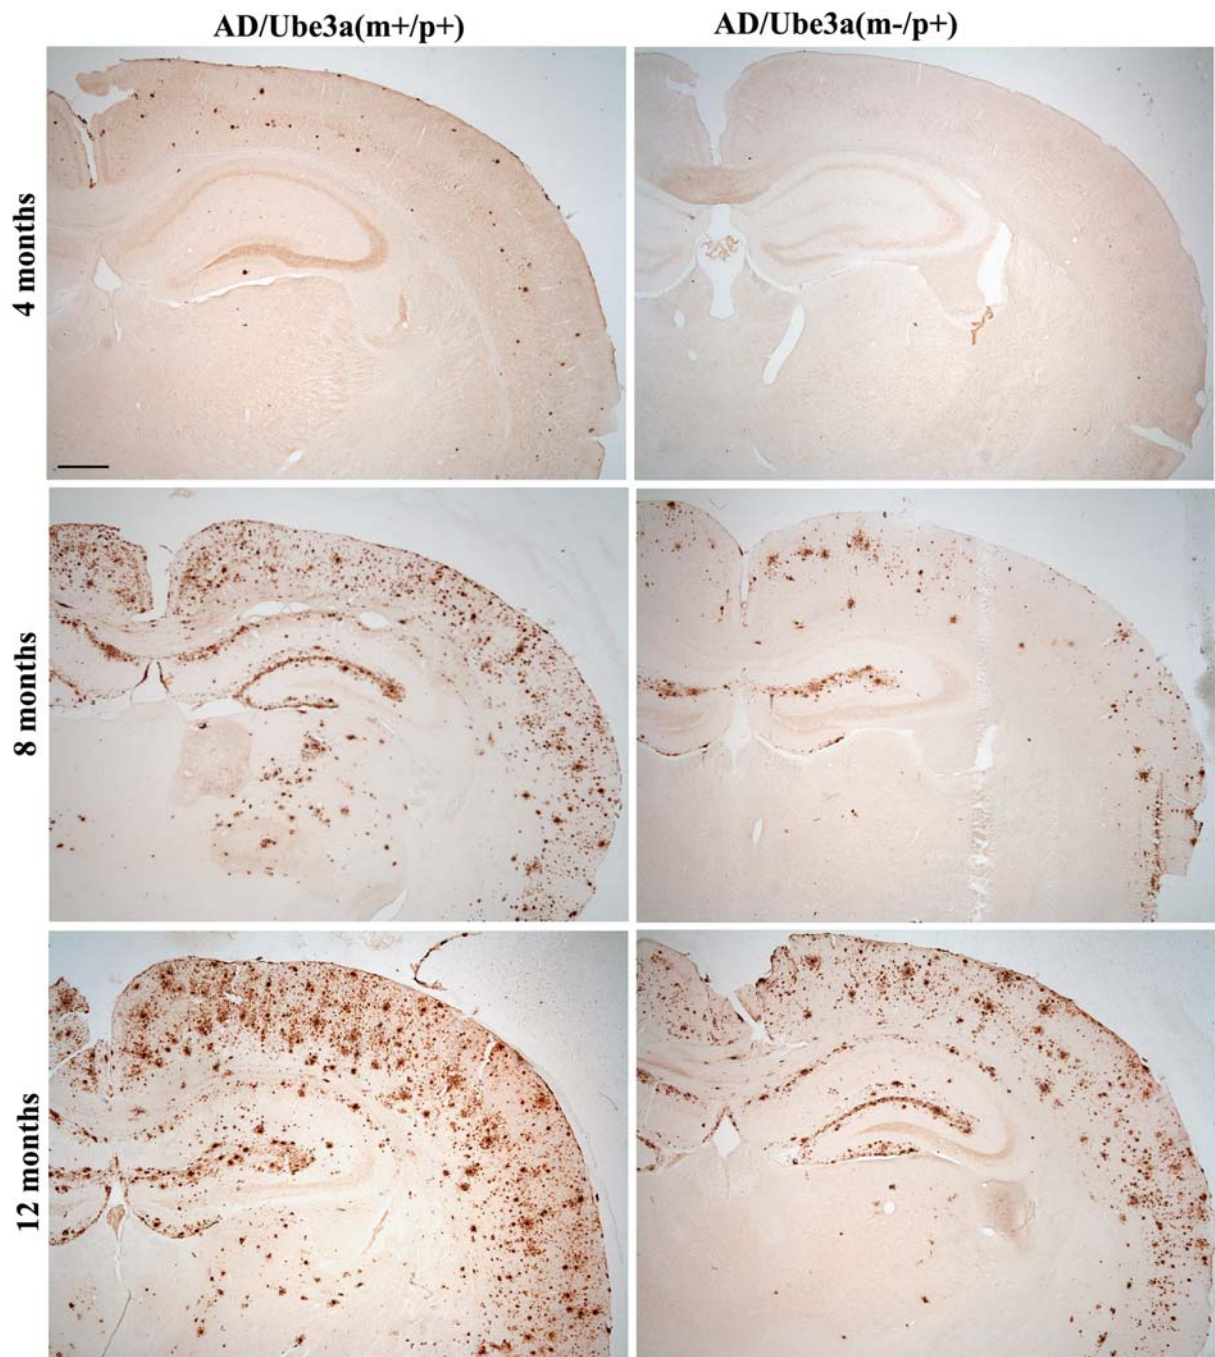

Supplement: Supplementary_information_ddx295.pdf [file Supplementary_information_ddx295.pdf]
